# Supplementary material
Source: PubMed Central journal article supplement (PMC514506)
Supplement: 7600332s1.pdf [file 7600332s1.pdf]

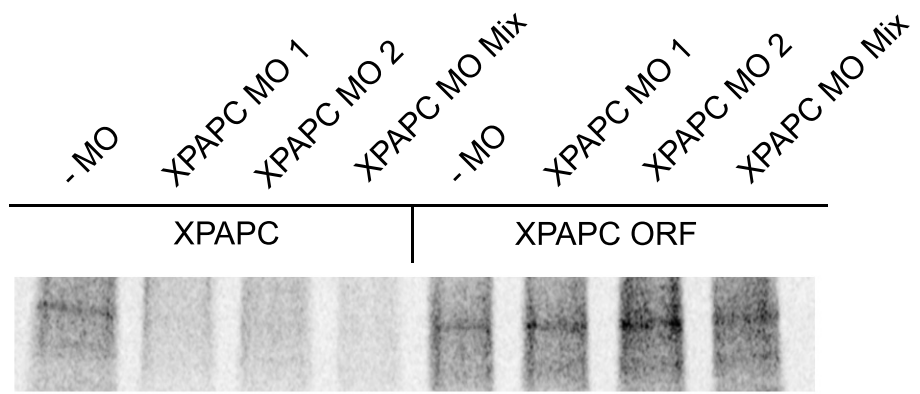

### **Supplementary Figure 1:**

XPAPC MO efficiently inhibits translation of XPAPC

The ability of XPAPC-MO 1 and XPAPC-MO 2 to block translation was confirmed *in vitro*. A full length XPAPC construct (XPAPC) containing the 5' UTR and an XPAPC-ORF construct without the 5' UTR are translated *in vitro* (TNT SP6 *in vitro* translation kit, Promega, Mannheim, Germany). The translation product was labelled with <sup>35</sup>S-methionine added to the reaction, separated on an 8% SDS-PAGE and analysed by phosphoimaging. *In vitro* translation of both XPAPC constructs yielded one major band. XPAPC-MO 1 and XPAPC-MO 2 (100 µM) inhibited translation of full length XPAPC, but complete blocking of translation was achieved only with an equimolar mixture of both MOs. The XPAPC-ORF construct, which does not contain the MO target site in the 5'UTR, was translated equally well in the presence of either MO or the MO mixture.
