# Supplementary material
Source: PubMed Central journal article supplement (PMC514506)
Supplement: 7600332s2.pdf [file 7600332s2.pdf]

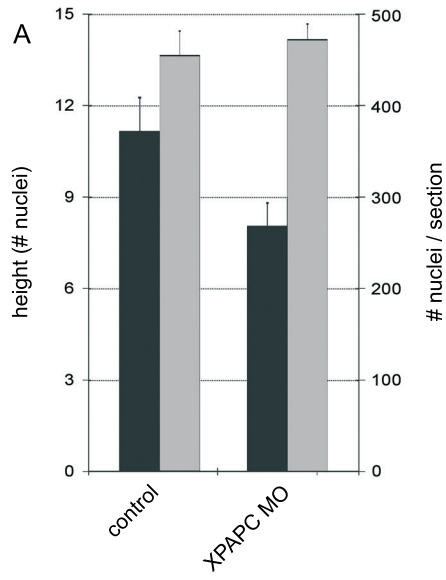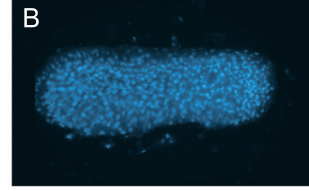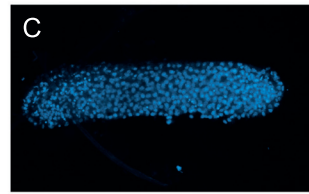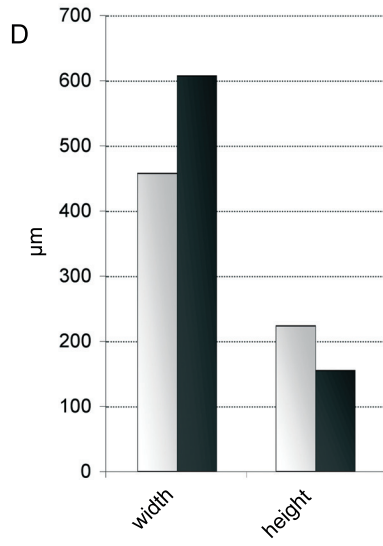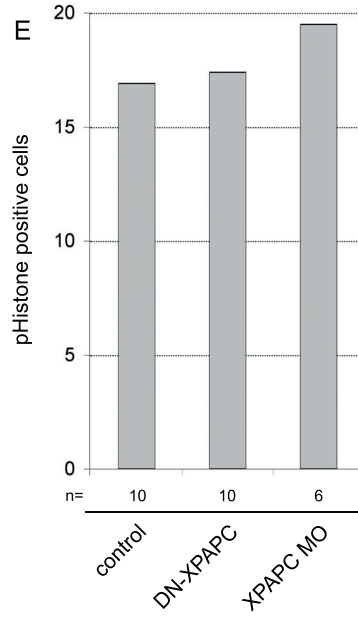

## Supplementary Figure 2:

Evaluation of the geometry of wild type and XPAPC-MO injected explants. XPAPC-MO induces a broader IMZ, which is at the expense of explant height.

A: Cross sections of wild type explants showed an average height of  $11 \pm 1$  cells / nuclei, in XPAPC-MO injected explants this value dropped to  $8 \pm 1$  nuclei (black bars, left y-axis). The total number of cells per section remained constant (grey bars, right y-axis). Representative images of DAPI stained cross-sections from wild-type and XPAPC-MO injected explants are shown in B and C respectively.

D: Width and height of the IMZ in wild type (grey) and XPAPC-MO injected (black) explants show that XPAPC-MO causes a broader but flatter IMZ. Again the cross-section area remained constant (not shown).

E: The number of proliferating cells in the IMZ as judged by anti-phospho Histone H3 immunostaining is not changed by dnXPAPC or XPAPC-MO.
