# Supplementary material
Source: PubMed Central journal article supplement (PMC514506)
Supplement: 7600332s5.pdf [file 7600332s5.pdf]

**Supplementary Figure 4:**

Movie of convergence and extension in a wild-type explant. Cell membranes were labelled with membrane-tethered GFP. All cells acquire a bipolar shape with their long axis oriented parallel to the ML axis (arrow).
