# Supplementary material
Source: PubMed Central journal article supplement (PMC514506)
Supplement: 7600332s7.pdf [file 7600332s7.pdf]

### **Supplementary Figure 5:**

Movie of convergence and extension in a XPAPC-MO injected explant. Cell membranes were labelled with membrane-tethered GFP. The white line separates randomly polarised cells (spiral) from cells with coordinated polarisation; the arrow indicates the ML axis.
